**Table S1. Statistics and sample size for data shown in Figs 1–5**

**Experiment 1:**

| Figure              | n (workers)       |        |      |      | Nested ANOVA for “treatment”                                                        | Nested ANOVA for “rank” nested in “treatment”                                      |
|---------------------|-------------------|--------|------|------|-------------------------------------------------------------------------------------|------------------------------------------------------------------------------------|
|                     | Untreated control | 1.2 mg | 3 mg | 6 mg |                                                                                     |                                                                                    |
| Figure 1a (ovaries) | 57                | 9      | 36   | 15   | $F_{3,105}=67.7$ , $p<0.001$ ; post-hoc: $p<0.02$ for Un. and 1.2 mg vs. 3 and 6 mg | $F_{8,105}=10.4$ , $p<0.001$ ; post hoc $p<0.02$ for Un. and 1.2 mg vs. 3 and 6 mg |
| Figure 1b (JH)      | 18                | -      | 18   | -    | $F_{1,30}=6.6$ , $p=0.015$ for Un. vs. 3mg                                          | $F_{4,30}=1.4$ , $p=0.25$ for Un. vs. 3mg                                          |
| Figure 1b (MF)      | 18                | -      | 18   | -    | $F_{1,30}=0.46$ , $p=0.5$ for Un. vs. 3mg                                           | $F_{4,30}=0.96$ , $p=0.43$ for Un. vs. 3mg                                         |

**Experiment 2:**

| Figure                      | n (workers)       |           |     |    | Nested ANOVA for “treatment”                                                                | Nested ANOVA for “rank” nested in “treatment”                                                                                                                                                                                            |
|-----------------------------|-------------------|-----------|-----|----|---------------------------------------------------------------------------------------------|------------------------------------------------------------------------------------------------------------------------------------------------------------------------------------------------------------------------------------------|
|                             | Untreated control | Precocene | DMF | JH |                                                                                             |                                                                                                                                                                                                                                          |
| Figure 2 (ovaries)          | 36                | 36        | 42  | 33 | $F_{1,66}=7.72$ , $p=0.007$ for Un. Vs. Prec.<br>$F_{1,69}=7.5$ , $p=0.007$ for DMF vs. JH  | $F_{4,66}=15.78$ , $p<0.001$ ; post hoc: NS for same ranks in different treatments<br>$F_{4,69}=8.47$ , $p<0.001$ ; post hoc: NS for same ranks in different treatments                                                                  |
| Figure 3 (aggression)       | 36                | 42        | 42  | 33 | $F_{1,72}=14.23$ , $p<0.001$ for Un. vs. Prec.<br>$F_{1,69}=4.65$ , $p=0.03$ for DMF vs. JH | $F_{4,72}=23.2$ , $p<0.001$ ; post hoc: $p<0.001$ for Un./1 <sup>st</sup> vs. all other groups<br>$F_{4,69}=6.01$ , $p<0.001$ ; post hoc: $p<0.003$ for JH/1 <sup>st</sup> vs. all groups but JH/2 <sup>nd</sup> and DMF/1 <sup>st</sup> |
| Total secretion (no figure) | 33                | 33        | 30  | 24 | $F_{1,60}=1.91$ , $p=0.17$ for Un. vs. Prec.<br>$F_{1,48}=0.59$ , $p=0.44$ for DMF vs. JH   | $F_{4,69}=1.3$ , $p=0.28$ for Un. vs. Prec.<br>$F_{4,48}=0.5$ , $p=0.73$ for DMF vs. JH                                                                                                                                                  |
| Figure 4 (esters)           | 33                | 33        | 30  | 24 | $F_{1,60}=4.21$ , $p=0.04$ for Un. vs. Prec.<br>$F_{1,48}=0.37$ , $p=0.54$ for DMF vs. JH   | $F_{4,60}=2.93$ , $p=0.02$ ; post hoc: $p=0.02$ for $\gamma$ /Prec. vs. all groups but $\alpha$ /Un. and $\alpha$ /Prec.<br>$F_{4,48}=2.51$ , $p=0.05$ for DMF vs. JH; post hoc: $p>0.05$ for all groups                                 |
| Figure 5 (JH)               | 13                | 11        | 14  | 12 | $F_{1,18}=4.84$ , $p=0.04$ for Un. vs. Prec.<br>$F_{1,20}=9.73$ , $p=0.005$ for DMF vs. JH  | $F_{4,18}=1.03$ , $p=0.41$ for Un. vs. Prec.<br>$F_{4,20}=3.09$ , $p=0.03$ ; post hoc: $p<0.05$ for $\alpha$ worker vs. all other groups                                                                                                 |
| Figure 5 (MF)               | 13                | 11        | 14  | 12 | $F_{1,18}=3.53$ , $p=0.076$ for Un. vs. Prec.<br>$F_{1,20}=0.86$ , $p=0.36$ for DMF vs. JH  | $F_{4,18}=1.04$ , $p=0.41$ for Un. vs. Prec.<br>$F_{4,20}=0.09$ , $p=0.98$ for DMF vs. JH                                                                                                                                                |
